# Supplementary material
Source: PubMed Central journal article supplement (PMC3357913)
Supplement: supp_139.12.2234_DEV075184TableS1.pdf [file supp_139.12.2234_DEV075184TableS1.pdf]

**Table S1. List of alleles used in this study.**

|             | <b>Gene</b>   | <b>Allele</b>                               | <b>Source</b>                           | <b>Homology</b>                        |
|-------------|---------------|---------------------------------------------|-----------------------------------------|----------------------------------------|
| <b>LGI</b>  | <i>lin-44</i> | <i>n1792</i>                                | CGC                                     | Wnt                                    |
|             | <i>mig-1</i>  | <i>e1787</i>                                | CGC                                     | Frizzled                               |
|             | <i>lin-17</i> | <i>n671</i>                                 | CGC                                     | Frizzled                               |
|             | <i>mom-5</i>  | <i>mom-5(or57)</i><br><i>dpy-5(e61)/HT2</i> | CGC                                     | Frizzled                               |
|             | <i>pry-1</i>  | <i>mu38</i>                                 | CGC                                     | Axin                                   |
|             | <i>ceh-12</i> | <i>gk391</i>                                | CGC                                     | HB9                                    |
|             | <i>unc-37</i> | <i>e262</i>                                 | CGC                                     | Groucho                                |
| <b>LGII</b> | <i>unc-4</i>  | <i>e2322ts</i>                              |                                         | Homeodomain<br>transcription<br>factor |
|             |               | <i>e2323</i>                                |                                         |                                        |
|             |               | <i>e120</i>                                 |                                         |                                        |
|             | <i>cwn-1</i>  | <i>ok546</i>                                |                                         | Wnt                                    |
| <b>LGIV</b> | <i>egl-20</i> | <i>n585</i>                                 | CGC                                     | Wnt                                    |
|             | <i>egl-20</i> | <i>mu39</i>                                 | CGC                                     |                                        |
|             | <i>egl-20</i> | <i>hu120</i>                                | CGC                                     |                                        |
|             | <i>cwn-2</i>  | <i>ok895</i>                                | CGC                                     |                                        |
| <b>LGV</b>  | <i>cfz-2</i>  | <i>ok1201</i>                               | CGC                                     | Frizzled                               |
| <b>LGX</b>  | <i>lin-18</i> | <i>lin-18(e620)</i><br><i>dpy-7(e1324)</i>  | H.R. Horvitz<br>(Inoue et al.,<br>2004) | Ryk                                    |
|             | <i>bar-1</i>  | <i>ga80</i>                                 | CGC                                     | $\beta$ -catenin                       |
|             |               | <i>mu63</i>                                 | CGC                                     |                                        |

CGC, *Caenorhabditis* Genetics Center.
