# Supplementary material
Source: PubMed Central journal article supplement (PMC3357913)
Supplement: supp_139.12.2234_DEV075184TableS2.pdf [file supp_139.12.2234_DEV075184TableS2.pdf]

**Table S2. Primer sequences for verification of mutations in genetic crosses.**

| <b>Gene(allele)</b>                         | <b>Forward primer Sequence</b> | <b>Reverse primer sequence</b> | <b>Reference</b>                                   |
|---------------------------------------------|--------------------------------|--------------------------------|----------------------------------------------------|
| <i>mig-1(e1787)</i>                         | CCTAGGCCACCAACTTCAAA           | CGCAGACTTCTCAACTCTCA           | Pan et al., 2006                                   |
| <i>lin-17(n671)</i>                         | GCGAGCATGTGCAGAGAGAG           | CCGTAAATCGACACAAGCAC           | Sawa et al., 1996                                  |
| <i>lin-44(n1792)</i>                        | GAGAGCCTTGGTTTGTGAG            | G TTCATAATTTTAGCACCCAAT        | Herman et al., 1995                                |
| <i>pry-1(mu38)</i>                          | CATGCCTAGGTTCCGTCAAG           | AAGTTTTTCGCGGTAAGACCC          | Maloof and Kenyon, 1998;<br>Korswagen et al., 2002 |
| <i>cwn-1(ok546)</i>                         | CGAGAATAGAAAAGACCAAGCC         | CAGTACAACCGGATGTCTGAATA        | Zinovyeva and Forrester,<br>2005                   |
| <i>egl-20(n585)</i><br><i>egl-20(hu120)</i> | ATACAGTACGCAACAAGTTC           | CACATAAGACAACACCTGATC          | Maloof and Kenyon, 1998                            |
| <i>cwn-2(ok895)</i>                         | GATGATTCCACGGAGAAGTTG          | CATTCTTAGGCTTAGAGAAATG         | Zinovyeva and Forrester,<br>2005                   |
| <i>cfz-2(ok1201)</i>                        | GCCGGGAACCTTGAGATCAATG         | CATAACTATAGTCCAGATGGCCC        | Zinovyeva and Forrester,<br>2005                   |
| <i>bar-1(ga80)</i>                          | ACCTGGATCCGAACCTAGTTA          | GAGCATTGTTGCATGTTGGAA          | Eisenmann et al., 1998                             |
