# Supplementary material
Source: PubMed Central journal article supplement (PMC3357913)
Supplement: supp_139.12.2234_DEV075184TableS3.pdf [file supp_139.12.2234_DEV075184TableS3.pdf]

**Table S3. List of transgenes used in this study together with primer sequences used to synthesize the plasmids.**

| <b>Name</b>                            | <b>Array</b>                                                                                  | <b>Citation</b>                  | <b>Primer sequences</b>                                                                                                                                                 |
|----------------------------------------|-----------------------------------------------------------------------------------------------|----------------------------------|-------------------------------------------------------------------------------------------------------------------------------------------------------------------------|
| <i>wdIs85</i> ,<br><i>wdEx310</i>      | <i>Pceh-12::GFP, unc-119[+]</i>                                                               | Von Stetina et al., 2007b        |                                                                                                                                                                         |
| <i>gmEx365</i>                         | <i>Plim-4::egl-20::GFP</i>                                                                    | Pan et al., 2006                 |                                                                                                                                                                         |
| <i>wdIs4</i>                           | <i>Punc-4::GFP</i>                                                                            | Esmacili et al., 2002            |                                                                                                                                                                         |
| <i>wdIs54</i>                          | <i>Punc-7::UNC-7S::GFP, col-19::GFP</i>                                                       | Starich et al., 2009, this work  |                                                                                                                                                                         |
| <i>wdEx639</i>                         | <i>Punc-4::MIG-1::YFP; dpy-20[+]</i>                                                          |                                  | Punc-4_F2 (CCCGGAACTGGGATATAATTTC); Punc-4_REV (ACCGTATCATTTTCACTTTTTG); pPD95.75 3'UTR[X] and Punc-4_MIG-1GFP_OVER (CAAAAAGTGAAAATGATCGGTATGGGACCATTTCGTGGTTA)         |
| <i>wdEx636</i>                         | <i>Punc-4::_NT-BAR-1; dpy-20[+]</i>                                                           |                                  | Punc-4_F2 (CCCGGAACTGGGATATAA TTTC); Punc-4_REV (ACCGTATCATTTTCACTTTTTG); 3'BAR-1_NT (GCATGTAGGGATGTTGAAGA); _NT-BAR-1_OVER (CAAAAAGTGAAAATGATCGGTATGGCCGACTATGAGCCGAT) |
| <i>wdIs65</i> ,<br><i>wyEx184</i><br>5 | <i>MVC46/Punc-4::NLG-1::GFP1-10, MVC12/Pflp-18::NLG-1::GFP11, Punc-4::mCHERRY, odr-1::RFP</i> | Feinberg et al., 2008, this work |                                                                                                                                                                         |
