# Supplementary material
Source: PubMed Central journal article supplement (PMC3357913)
Supplement: supp_139.12.2234_DEV075184TableS4.pdf [file supp_139.12.2234_DEV075184TableS4.pdf]

**Table S4. Microarray results detect Wnt receptors that are expressed in A-class motor neurons and negatively regulated by the UNC-4 pathway**

| Wnt receptors | Microarray data    |                    |                               | GFP reporters      |     |
|---------------|--------------------|--------------------|-------------------------------|--------------------|-----|
|               | WT DA <sup>1</sup> | WT VA <sup>2</sup> | <i>unc-37</i> VA <sup>3</sup> | Transgenics        | VA  |
| <i>mom-5</i>  | EG                 | EG                 | 1.8X                          | <i>mom-5::GFP</i>  | Yes |
| <i>mig-1</i>  | EG                 | 1.6X               | 1.8X                          | <i>mig-1::GFP</i>  | Yes |
| <i>lin-17</i> | 1.7X               | ND                 | ND                            | <i>lin-17::GFP</i> | Yes |
| <i>cfz-2</i>  | ND                 | EG                 | ND                            | ?                  |     |
| <i>lin-18</i> | ND                 | ND                 | ND                            | ?                  |     |
| <i>cam-1</i>  | EG                 | EG                 | ND                            | ?                  |     |

<sup>1</sup>Fox et al., 2005

<sup>2</sup>Von Stetina et al., 2007a

<sup>3</sup>Von Stetina et al., 2007b
