# Supplementary material
Source: PubMed Central journal article supplement (PMC3357913)
Supplement: supp_139.12.2234_DEV075184TableS5.pdf [file supp_139.12.2234_DEV075184TableS5.pdf]

**Table S5. Compilation of tapping assay data.**

| Strain                                           | % Unc        | % Suppressed        |
|--------------------------------------------------|--------------|---------------------|
| WT                                               | 0            | 100                 |
| <i>unc-4(e2320)</i>                              | 98           | 2                   |
| <i>ceh-12(gk391); unc-4(e2320)</i>               | 58           | 42                  |
| <i>unc-4(e120)</i>                               | 99           | 1                   |
| <i>ceh-12(gk391); unc-4(e120)</i>                | 54           | 46                  |
| <i>unc-4(e120); egl-20(hu120)</i>                | 92           | 8                   |
| <i>ceh-12(gk391); unc-4(e120); egl-20(hu120)</i> | 75           | 25                  |
| <i>unc-4(e120); egl-20(n585)</i>                 | 87           | 13                  |
| <i>ceh-12(gk391); unc-4(e120); egl-20(n585)</i>  | 65           | 35                  |
| <i>unc-4(e2323)</i>                              | 63           | 38                  |
| <i>ceh-12(gk391); unc-4(e2323)</i>               | 6            | 94                  |
| <i>unc-4(e2323); egl-20(n585)</i>                | 13           | 87                  |
| <i>unc-37(e262)</i>                              | 87           | 13                  |
| <i>unc-37(e262); egl-20(n585)</i>                | 70           | 30                  |
|                                                  |              |                     |
| <i>unc-37(e262)</i>                              | 82           | 18                  |
| <i>unc-37(e262); bar-1(mu63)</i>                 | 64           | 36                  |
| <i>unc-4(e2323)</i>                              | 63           | 38                  |
| <i>unc-4(e2323); bar-1(mu63)</i>                 | 54           | 46                  |
|                                                  |              |                     |
| <i>unc-4(e120)</i> Empty Vector RNAi             | 74           | 26                  |
| <i>unc-4(e120)</i> <i>mom-5</i> RNAi             | 49           | 51                  |
|                                                  |              |                     |
| <i>unc-4(e2322ts)</i>                            | 67           | 33                  |
| <i>unc-4(e2322ts); lin-18 dpy-7</i>              | 72           | 28                  |
| <i>unc-4(e2322ts); cfz-2(ok1201)</i>             | 67           | 33                  |
|                                                  |              |                     |
| WT                                               | 0            | 100                 |
| <i>wdEx636</i>                                   | 20           | 80                  |
|                                                  |              |                     |
| <b>at 23°C</b>                                   | <b>% Unc</b> | <b>% Suppressed</b> |
| WT                                               | 0            | 100                 |
| <i>unc-4(e2322ts)</i>                            | 80           | 20                  |
| <i>unc-4(e2322ts); egl-20(n585)</i>              | 26           | 74                  |
| <i>unc-4(e2322ts); mig-1(e1787)</i>              | 42           | 58                  |
| <i>unc-4(e2322ts); ceh-12(gk391)</i>             | 4            | 96                  |

|                                                          |              |                     |
|----------------------------------------------------------|--------------|---------------------|
| WT                                                       | 0            | 100                 |
| <i>unc-4(e2322ts)</i>                                    | 68           | 32                  |
| <i>unc4(e2322ts)</i> 1uM pyrvinium                       | 52           | 48                  |
| <i>unc4(e2322ts)</i> 10uM pyrvinium                      | 44           | 56                  |
| <i>unc-4(e2322ts); egl-20(n585)</i>                      | 26           | 74                  |
|                                                          |              |                     |
| <b>at 16°C</b>                                           | <b>% Unc</b> | <b>% Suppressed</b> |
| WT                                                       | 0            | 100                 |
| <i>unc-4(e2322ts)</i>                                    | 0            | 100                 |
| (WT) <i>dpy-20 wdEx639</i>                               | 1            | 99                  |
| <i>unc-4(e2322ts); dpy-20 wdEx639</i>                    | 38           | 62                  |
| <i>ceh-12(gk391); dpy-20 wdEx639</i>                     | 1            | 99                  |
| <i>ceh-12; unc-4; dpy-20 wdEx639</i>                     | 0            | 100                 |
|                                                          | <b>% Unc</b> | <b>% Suppressed</b> |
| <i>unc-4(e2322ts)</i>                                    | 0            | 100                 |
| <i>lin-17(n671)</i>                                      | 10           | 90                  |
| <i>unc-4(e2322ts); lin-17(n671)</i>                      | 55           | 45                  |
| <i>unc-4(e2322ts); cwn-1(ok546)</i>                      | 26           | 74                  |
| <i>unc-4(e2322ts); lin-44(n1792)</i>                     | 24           | 76                  |
|                                                          |              |                     |
| <i>unc-4(e2322ts)</i>                                    | 0            | 100                 |
| <i>pry-1(mu38)</i>                                       | 0            | 100                 |
| <i>unc-4(e1222ts); pry-1(mu38)</i>                       | 38           | 62                  |
|                                                          |              |                     |
| WT                                                       | 0            | 100                 |
| <i>ceh-12</i>                                            | 1            | 99                  |
| WT + 10mM LiCl                                           | 77           | 23                  |
| <i>ceh-12</i> + 10mM LiCl                                | 62           | 38                  |
|                                                          |              |                     |
| <i>ceh-12(gk391); unc-4(e2320)</i><br>Empty Vector RNAi  | 91.5         | 8.5                 |
| <i>ceh-12(gk391); unc-4(e2320)</i><br><i>egl-20</i> RNAi | 93.5         | 6.5                 |
