# Supplementary material
Source: PubMed Central journal article supplement (PMC3357913)
Supplement: supp_139.12.2234_DEV075184TableS6.pdf [file supp_139.12.2234_DEV075184TableS6.pdf]

**Table S6. Compilation of data of *ceh-12::GFP* expression in VA motor neurons.**

| <b>Anterior VAs</b>         | % <i>ceh-12::GFP</i> positive neurons | % No <i>ceh-12::GFP</i> expression | Total VA neurons scored |
|-----------------------------|---------------------------------------|------------------------------------|-------------------------|
| <i>unc-4</i>                | 0.63                                  | 51.2                               | 160                     |
| <i>lin-44; unc-4</i>        | 11                                    | 45.1                               | 355                     |
| <i>cwn-1 unc-4</i>          | 6.7                                   | 48.9                               | 180                     |
| <i>lin-17; unc-4</i>        | 3.6                                   | 50.0                               | 196                     |
| <i>lin-44 lin-17; unc-4</i> | 3.9                                   | 51.7                               | 180                     |
| <i>lin-44; cwn-1 unc-4</i>  | 4.2                                   | 48.7                               | 189                     |
| <i>unc-4; egl-20</i>        | 0.00                                  | 53.9                               | 167                     |
| <i>lin-44;unc-4; egl-20</i> | 6.3                                   | 43.7                               | 190                     |
|                             |                                       |                                    |                         |
| <b>Posterior VAs</b>        | % <i>ceh-12::GFP</i> positive neurons | % No <i>ceh-12::GFP</i> expression | Total VA neurons scored |
| <i>unc-4</i>                | 24.4                                  | 23.8                               | 160                     |
| <i>lin-44; unc-4</i>        | 23.7                                  | 20.3                               | 355                     |
| <i>cwn-1 unc-4</i>          | 20.0                                  | 24.4                               | 180                     |
| <i>lin-17; unc-4</i>        | 26.0                                  | 20.4                               | 196                     |
| <i>lin-44 lin-17; unc-4</i> | 21.1                                  | 23.3                               | 180                     |
| <i>lin-44; cwn-1 unc-4</i>  | 19.0                                  | 28.0                               | 189                     |
| <i>unc-4; egl-20</i>        | 2.40                                  | 43.7                               | 167                     |
| <i>lin-44;unc-4; egl-20</i> | 13.2                                  | 36.8                               | 190                     |
|                             |                                       |                                    |                         |
|                             |                                       |                                    |                         |
|                             | % <i>ceh-12::GFP</i> positive neurons | % No <i>ceh-12::GFP</i> expression | Total VA neurons scored |
| WT                          | 0                                     | 100                                | 180                     |
| <i>wdEx636</i>              | 9.09                                  | 90.9                               | 198                     |
