# Supplementary material
Source: PubMed Central journal article supplement (PMC3357913)
Supplement: supp_139.12.2234_DEV075184TableS7.pdf [file supp_139.12.2234_DEV075184TableS7.pdf]

**Table S7. Percentage of VA motor neurons with ectopic AVB to VA UNC-7S::GFP positive gap junctions vs percentage of cells with no UNC-7S::GFP.**

| <b>Anterior VAs</b>  | % UNC-7S::GFP positive neurons | % No UNC-7S::GFP puncta | Total VA neurons scored |
|----------------------|--------------------------------|-------------------------|-------------------------|
| WT                   | 9.2                            | 90.8                    | 109                     |
| <i>lin-17</i>        | 24.4                           | 75.6                    | 86                      |
| <i>cwn-1</i>         | 19.7                           | 80.3                    | 71                      |
|                      |                                |                         |                         |
| <b>Posterior VAs</b> | % UNC-7S::GFP positive neurons | % No UNC-7S::GFP puncta | Total VA neurons scored |
| WT                   | 11.5                           | 88.5                    | 104                     |
| <i>lin-17</i>        | 22.2                           | 77.8                    | 54                      |
| <i>cwn-1</i>         | 12.1                           | 87.9                    | 58                      |
